# Supplementary material for: SIGffRid: A tool to search for sigma factor binding sites in bacterial genomes using comparative approach and biologically driven statistics
Source: Springer Nature journal article supplement (doi:10.1186/1471-2105-9-73), 2008-01-31
Supplement: 12859_2007_2058_MOESM1_ESM.pdf [file 12859_2007_2058_MOESM1_ESM.pdf]

|  |                                                              |
|--|--------------------------------------------------------------|
|  | $\sigma$ factor: name [known/deduced consensus if available] |
|  | known promoters (when no consensus can be clearly deduced)   |
|  | SIGffRid output motifs                                       |

<sup>m4</sup> links SIGffRid motifs to known promoter(s) it overlap

**Table 1:** SIGffRid results compared with known SFBSs motif

Motifs are presented as follow: DNA\_motif (R ratio, LRT likelyhood ratio test).  
(for *S. coelicolor*:  $R \geq 0.48$ ,  $LRT \geq 3.84$ ; for *S. avermitilis*:  $R \geq 0.44$ ,  $LRT \geq 3.84$ )

|                                                                                   |                                             |
|-----------------------------------------------------------------------------------|---------------------------------------------|
| <b><math>\sigma</math> factor: HrdB</b>                                           |                                             |
| <b>known HrdB-dependent promoters overlapped by SIGffRid output motifs</b>        |                                             |
| ?n <sub>7</sub> taggct (SCO0598 <sup>m4</sup> , sigBp2) [1]                       |                                             |
| ttgaccn <sub>18</sub> tacggg (SCO1429 <sup>m3</sup> , chiD) [2, 3]                |                                             |
| ttgacan <sub>18</sub> cacctt (SCO5003 <sup>m1m2</sup> , chiA) [3]                 |                                             |
| ttgaccn <sub>17</sub> tattct (SCO5376 <sup>m3</sup> , chiC) [2, 3]                |                                             |
| ttgacan <sub>17</sub> caaatt (SCO5673 <sup>m1</sup> , chiB) [3]                   |                                             |
| ttgacan <sub>17</sub> tagatt (SCOr09 <sup>m1</sup> , rrnDp2) [4, 5]               |                                             |
| <b>other HrdB promoters strongly similar to SIGffRid motifs</b>                   |                                             |
| tgggcan <sub>18</sub> taggat (SCO2026, gltBp1) [6]                                |                                             |
| ttgagcn <sub>18</sub> taggtt (SCO0561, furA) [7]                                  |                                             |
| ttgtcan <sub>18</sub> tagcat (SCO3471) [8]                                        |                                             |
| ttgactggn <sub>14</sub> ttgagt (SCO7263, chiF) [3]                                |                                             |
| ttgaacn <sub>18</sub> tagtgt (SCO2082, ftsZ2p) [9]                                |                                             |
| <b>SIGffRid output motifs (spacer range: 14 to 20)</b>                            |                                             |
| <i>S. coelicolor</i>                                                              | <i>S. avermitilis</i>                       |
| tgacan <sub>17,20</sub> an <sub>3</sub> t (0.50, 116.11) <sup>m1</sup>            |                                             |
| ttgacn <sub>19,20</sub> ancnt (0.61, 65.76) <sup>m2</sup>                         | ttgacn <sub>18,19</sub> tac (0.47, 28.69)   |
| ttgan <sub>18,19</sub> cta (0.60, 62.49) <sup>m3</sup>                            | ttgan <sub>18,19</sub> cta (0.49, 43.35)    |
|                                                                                   | ttgn <sub>18,20</sub> ccta (0.47, 67.51)    |
|                                                                                   | ttgn <sub>17,19</sub> cata (0.47, 45.32)    |
| cngn <sub>18,21</sub> taggct (0.67, 100.33) <sup>m4</sup>                         | cngn <sub>18,22</sub> taggct (0.62, 101.89) |
| <b><math>\sigma</math> factor: SigR ggaatn<sub>18</sub>ggt [10]</b>               |                                             |
| <b>SIGffRid output motifs (spacer range: 14 to 20)</b>                            |                                             |
| <i>S. coelicolor</i>                                                              | <i>S. avermitilis</i>                       |
| ggaatn <sub>16,19</sub> ggt (0.49, 54.69)                                         | ggaatn <sub>17,19</sub> ggtg (0.51, 30.98)  |
| gggaan <sub>18,20</sub> cggt (0.48, 42.97)                                        |                                             |
|                                                                                   | ggaatn <sub>17,18</sub> ggtg (0.44, 25.36)  |
| <b><math>\sigma</math> factor: BldN cgtaacn<sub>16</sub>cggtga (SCO4768) [11]</b> |                                             |
| <b>SIGffRid output motifs (spacer range: 14 to 20)</b>                            |                                             |
| <i>S. coelicolor</i>                                                              | <i>S. avermitilis</i>                       |
| cgtaan <sub>18,19</sub> ggt (0.57, 20.04)                                         | gtaacn <sub>17,18</sub> ggt (0.52, 17.81)   |

|                                                                                                                                                 |                                                                                  |
|-------------------------------------------------------------------------------------------------------------------------------------------------|----------------------------------------------------------------------------------|
| <b><math>\sigma</math> factor: ?</b> , motif similar <i>Bacillus subtilis</i> SigE binding site [12] <i>catattn</i> <sub>14</sub> <i>cataca</i> |                                                                                  |
| <b>SIGffRid output motifs (spacer range: 14 to 20)</b>                                                                                          |                                                                                  |
| <i>S. coelicolor</i>                                                                                                                            | <i>S. avermitilis</i>                                                            |
| <i>catan</i> <sub>15,17</sub> <i>tac</i> (0.54, 35.40)                                                                                          |                                                                                  |
| <b><math>\sigma</math> factor (?) involved in sporulation regulation</b>                                                                        |                                                                                  |
| <b>SIGffRid output motifs (spacer range: 14 to 20)</b>                                                                                          |                                                                                  |
| <i>S. coelicolor</i>                                                                                                                            | <i>S. avermitilis</i>                                                            |
| <i>cngn</i> <sub>14,16</sub> <i>agtaa</i> (0.49, 67.26)                                                                                         |                                                                                  |
| <i>agtaan</i> <sub>13,15</sub> <i>cng</i> (0.48, 58.48)                                                                                         |                                                                                  |
| <b>DNA-damage inducible promoters motif <i>ttgtcagtggn</i><sub>6</sub><i>taggg</i> [13]</b>                                                     |                                                                                  |
| <b>SIGffRid output motifs (spacer range: 14 to 20)</b>                                                                                          |                                                                                  |
| <i>S. coelicolor</i>                                                                                                                            | <i>S. avermitilis</i>                                                            |
| <i>tgtcagtn</i> <sub>14,15</sub> <i>tng</i> (0.59, 37.76)                                                                                       | <i>tgtcagtn</i> <sub>14,15</sub> <i>tng</i> (0.49, 36.73)                        |
| <i>tgtcagtn</i> <sub>14</sub> <i>tng</i> (0.63, 36.63)                                                                                          |                                                                                  |
| <b>SIGffRid output motifs (spacer range: 8 to 14)</b>                                                                                           |                                                                                  |
| <i>S. coelicolor</i>                                                                                                                            | <i>S. avermitilis</i>                                                            |
| <i>tgtcagtn</i> <sub>9,12</sub> <i>ang</i> (0.85, 62.24)                                                                                        |                                                                                  |
| <i>tgtcagtn</i> <sub>12,14</sub> <i>tng</i> (0.64, 43.08)                                                                                       | <i>tgtcagtn</i> <sub>12,14</sub> <i>tng</i> (0.48, 36.05)                        |
| <b>TFBS consensus for: BldD <i>agtgan</i><sub>m</sub><i>tcacc</i> (SCO) [14]</b>                                                                |                                                                                  |
| <b>SIGffRid output motifs (spacer range: 14 to 20)</b>                                                                                          |                                                                                  |
| <i>S. coelicolor</i>                                                                                                                            | <i>S. avermitilis</i>                                                            |
| <i>[ta]gtgan</i> <sub>18,20</sub> <i>tn</i> <sub>2</sub> <i>c</i> (0.57, 269.95)                                                                | <i>[ta]gtgan</i> <sub>18,20</sub> <i>tn</i> <sub>2</sub> <i>c</i> (0.48, 242.80) |
| <i>[ta]gtgan</i> <sub>16,18</sub> <i>cnt</i> (0.55, 290.18)                                                                                     | <i>[ta]gtgan</i> <sub>15,19</sub> <i>gn</i> <sub>2</sub> <i>t</i> (0.47, 400.42) |
| <i>tgtn</i> <sub>18,20</sub> <i>tna</i> (0.50, 69.54)                                                                                           | <i>tgtn</i> <sub>18,20</sub> <i>tna</i> (0.49, 99.17)                            |
| <i>tnan</i> <sub>16,18</sub> <i>tgtga</i> (0.57, 101.85)                                                                                        | <i>tnan</i> <sub>16,18</sub> <i>tgtga</i> (0.46, 100.52)                         |
| <i>tgtn</i> <sub>17,18</sub> <i>tnt</i> (0.55, 76.95)                                                                                           |                                                                                  |
| <i>tntn</i> <sub>16,19</sub> <i>ctgtga</i> (0.48, 35.58)                                                                                        |                                                                                  |
| <b>Other interesting SIGffRid output motifs (spacer range: 14 to 20)</b>                                                                        |                                                                                  |
| <i>S. coelicolor</i>                                                                                                                            | <i>S. avermitilis</i>                                                            |
| <i>taan</i> <sub>17,21</sub> <i>gtta</i> (0.73, 27.68)                                                                                          | <i>taan</i> <sub>17,21</sub> <i>gtta</i> (0.48, 18.33)                           |
| <i>cgggn</i> <sub>13,15</sub> <i>tta</i> (0.48, 80.37)                                                                                          |                                                                                  |
| <i>cccg</i> <sub>14,15</sub> <i>gtaa</i> (0.52, 45.87)                                                                                          |                                                                                  |

## References

- [1] Cho Y, Lee E, Ahn BE, Roe JH: **SigB, an RNA polymerase sigma factor required for osmoprotection and proper differentiation of *Streptomyces coelicolor* A3(2).** *Mol Microbiol* 2001, **42(1)**:205–214.
- [2] Delic I, Robbins P, Westpheling J: **Direct repeat sequences are implicated in the regulation of two *Streptomyces* chitinase promoters that are subject to carbon catabolite control.** *Proc Natl Acad Sci USA* 1992, **89**:1885–1889.

- [3] Saito A, Ishizaka M, Francisco PJ, Fijii T, Miyashita K: **Transcriptional co-regulation of five chitinase genes scattered on the *Streptomyces coelicolor* A3(2) chromosome.** *Microbiology* 2000, **146**:2937–2946.
- [4] Baylis H, Bibb M: **Transcriptional analysis of the 16S rRNA gene of the *rrnD* gene set of *Streptomyces coelicolor* A3(2).** *Mol Microbiol* 1988, **2(5)**:569–579.
- [5] Kang JG, Hahn MY, Ishihama A, Roe JH: **Identification of sigma factors for growth phase-related promoter selectivity of RNA polymerases from *Streptomyces coelicolor* A3(2).** *Nucleic Acids Res* 1997, **25(13)**:2566–2573.
- [6] Brown K, Wood S, Buttner M: **Isolation and characterization of the major vegetative RNA polymerase of *Streptomyces coelicolor* A3(2); renaturation of a sigma subunit using GroEL.** *Mol Microbiol* 1992, **6**:1133–1139.
- [7] Hahn J, Oh S, Roe J: **Regulation of the *furA* and *catC* operon, encoding a ferric uptake regulator homologue and catalase-peroxidase, respectively, in *Streptomyces coelicolor* A3(2).** *J Bacteriol* 2000, **182(13)**:3767–3774.
- [8] Buttner M, Brown N: **Two promoters from the *Streptomyces* plasmid pIJ101 and their expression in *Escherichia coli*.** *Gene* 1987, **51(2-3)**:179–186.
- [9] Flårdh K, Leibovitz E, Buttner M, Chater K: **Generation of a non-sporulating strain of *Streptomyces coelicolor* A3(2) by the manipulation of a developmentally controlled *ftsZ* promoter.** *Mol Microbiol* 2000, **38(4)**:737–749.
- [10] Paget M, Molle V, Cohen G, Aharonowitz Y, Buttner M: **Defining the disulphide stress response in *Streptomyces coelicolor* A3(2): identification of the  $\sigma^R$  regulon.** *Mol Microbiol* 2001, **42(4)**:1007–1020.
- [11] Bibb M, Molle V, Buttner M:  **$\sigma^{BldN}$ , an Extracytoplasmic Function RNA Polymerase Sigma Factor Required for Aerial Mycelium Formation in *Streptomyces coelicolor* A3(2).** *J Bacteriol* 2000, **182(16)**:4606–4616.
- [12] Roels S, Driks A, Losick R: **Characterization of *spoIVA*, a sporulation gene involved in coat morphogenesis in *Bacillus subtilis*.** *J Bacteriol* 1992, **174**:575–585.
- [13] Ahel I, Vujaklija D, Mikoc A, Gamulin V: **Transcriptional analysis of the *recA* gene in *Streptomyces rimosus*: identification of the new type of promoter.** *FEMS Microbiology Letters* 2002, **209**:133–137.

- [14] Elliot M, Bibb M, Buttner M, Leskiw B: **BldD is a direct regulator of key developmental genes in *Streptomyces coelicolor* A3(2)**. *Mol Microbiol* 2001, **40(1)**:257–269.
