# Supplementary material for: SIGffRid: A tool to search for sigma factor binding sites in bacterial genomes using comparative approach and biologically driven statistics
Source: Springer Nature journal article supplement (doi:10.1186/1471-2105-9-73), 2008-01-31
Supplement: 12859_2007_2058_MOESM3_ESM.pdf [file 12859_2007_2058_MOESM3_ESM.pdf]

**Table 4:** Classification of *Streptomyces coelicolor* genes with a putative SFBS  $CGTAA N_{\{18\ 19\}}GTT$  in their upstream region

|        |                                                                 |                                                                         |                                     |
|--------|-----------------------------------------------------------------|-------------------------------------------------------------------------|-------------------------------------|
| 0.0.0  | Unknown function, no known homologs (1049)                      |                                                                         |                                     |
|        | SCO3324 SCE68.22                                                | hypothetical protein                                                    | <b>cgtaaccaagtgccgcccgtcggt</b>     |
|        | SCO3374 SCE94.25                                                | hypothetical proline-rich protein                                       | <b>cgtaaccgagcgctcttcgactggt</b>    |
|        | SCO6909 SC1B2.15                                                | hypothetical protein SC1B2.15                                           | <b>cgtaattcactaagtgcagtgccggt</b>   |
| 0.0.2  | Conserved in organism other than <i>Escherichia coli</i> (1322) |                                                                         |                                     |
|        | SCO4398 SCD10.30c                                               | conserved hypothetical protein                                          | <b>cgtaacccccgggtgggcccgggagtt</b>  |
|        | SCO4543 2SCD4.14c                                               | hypothetical protein                                                    | <b>cgtaagcggtacagggacaggtgagtt</b>  |
|        | SCO5581 SC7A1.25c                                               | conserved hypothetical protein                                          | <b>cgtaaccgcccgtgcgtcggaccggt</b>   |
| 1.5.0  | Transport/binding proteins (520)                                |                                                                         |                                     |
|        | SCO2422 SCC42.03c                                               | putative ABC-transporter ATP-binding protein                            | <b>cgtaacgtgccgggtgcgggtgctcggt</b> |
|        | SCO6483 SC9C7.19                                                | putative efflux protein                                                 | <b>cgtaactcgtcgcacttgttcgcagtt</b>  |
| 2.1.3  | Degradation of polysaccharides (92)                             |                                                                         |                                     |
|        | SCO2430 SCC24.01                                                | putative sugar hydrolase (fragment) (putative secreted protein)         | <b>cgtaaccgggcccacggcctacgggtt</b>  |
|        | SCO7019 aml                                                     | putative secreted beta-galactosidase (fragment) secreted alpha-amylase. | <b>cgtaagagattttctgcaactttccggt</b> |
| 2.2.1  | Amino acyl tRNA syn; tRNA modific'n (34)                        |                                                                         |                                     |
|        | SCO1595 pheS                                                    | putative phenylalanyl-tRNA synthetase alpha chain                       | <b>cgtaatccggttccacagccccggt</b>    |
| 2.2.4  | Glycoprotein (11)                                               |                                                                         |                                     |
|        | SCO2981 SCE50.09                                                | putative glycosyl transferase                                           | <b>cgtaaccaagcgggtccaccggccggt</b>  |
| 2.2.10 | Proteins - translation and modification (36)                    |                                                                         |                                     |
|        | SCO1528 SCL2.18                                                 | putative elongation factor                                              | <b>cgtaaaaaatgcacgcgcgtacttggt</b>  |
| 3.6.0  | Fatty acid biosynthesis (3)                                     |                                                                         |                                     |
|        | SCO6473 SC9C7.09c                                               | crotonyl CoA reductase                                                  | <b>cgtaaagatttcatctgagaagagtt</b>   |
| 3.8.0  | Secondary metabolism (165)                                      |                                                                         |                                     |
|        | SCO5799 SC4H2.20                                                | putative aminotransferase                                               | <b>cgtaacccccgtgaacggtcctcggt</b>   |

|        |                                                   |                                                         |                                                                                                                                                     |
|--------|---------------------------------------------------|---------------------------------------------------------|-----------------------------------------------------------------------------------------------------------------------------------------------------|
| 4.1.6  | Gram +ve membrane (836)                           |                                                         |                                                                                                                                                     |
|        | SCO1540 SCL2.30c                                  | putative membrane protein                               | <b>cgtaactcttccggccgatggaccggt</b>                                                                                                                  |
| 4.1.7  | Gram +ve exported/lipoprotein (439)               |                                                         |                                                                                                                                                     |
|        | SCO5202 2SC3B6.26                                 | putative secreted protein                               | <b>cgtaacccgcccccgcggtgagcgtt</b>                                                                                                                   |
| 5.1.2  | Phage-related functions and prophages (25)        |                                                         |                                                                                                                                                     |
|        | SCO5612 SC2E1.29                                  | putative ATP binding protein                            | <b>cgtaagcggctcctccgtctcctggt</b>                                                                                                                   |
| 6.3.5  | LacI (34)                                         |                                                         |                                                                                                                                                     |
|        | SCO7014 SC1H10.03c                                | probable LacI-family transcriptional regulatory protein | <b>cgtaacggggatcggcaacgactggt</b>                                                                                                                   |
| 6.3.8  | TetR (122)                                        |                                                         |                                                                                                                                                     |
|        | SCO3367 SCE94.18                                  | putative tetR-family regulator                          | <b>cgtaactagccggcggtcaagtaagtt</b>                                                                                                                  |
| 6.3.11 | LuxR (GerR) (23)                                  |                                                         |                                                                                                                                                     |
|        | SCO4768 SC6G4.46                                  | putative two-component regulator                        | <b>cgtaactctttcgagtgaccatcggt</b>                                                                                                                   |
|        | Not known according to classification             |                                                         |                                                                                                                                                     |
|        | SCP1.28c<br>SCP1.167<br>SCP1.230 mmyB<br>SCP1.326 |                                                         | <b>cgtaagccggaggaagaggacgtagtt</b><br><b>cgtaacagcgcggtggacatcaccggt</b><br><b>cgtaagccccggtttaactctccggt</b><br><b>cgtaagccggaggaagaggacgtagtt</b> |
