# Supplementary material for: SIGffRid: A tool to search for sigma factor binding sites in bacterial genomes using comparative approach and biologically driven statistics
Source: Springer Nature journal article supplement (doi:10.1186/1471-2105-9-73), 2008-01-31
Supplement: 12859_2007_2058_MOESM4_ESM.pdf [file 12859_2007_2058_MOESM4_ESM.pdf]

**Table 5:** Classification of *Streptomyces coelicolor* genes with a putative SFBS  $TGTCAGTN_{\{14,15\}}TNG^{m4}$ ,  $TGTCAGTGN_{\{9,12\}}ANG^{m5}$ , and/or  $TGTCAGTN_{\{12,14\}}TNG^{m6}$  in their upstream region (similar to *recA* promoter). Genes are grouped according to the classification scheme for *S. coelicolor* available on [http://www.sanger.ac.uk/Projects/S\\_coelicolor/classwise.html](http://www.sanger.ac.uk/Projects/S_coelicolor/classwise.html). Genes without  $m4$ ,  $m5$  or  $m6$  label own to a possible cluster (with previously cited gene) and are cited because they may be related to DNA damage. Therefore, those genes DO NOT correspond to the classification!!!!

| 0.0.0                     | Unknown function, no known homologs (1049)               |                                         |                            |
|---------------------------|----------------------------------------------------------|-----------------------------------------|----------------------------|
| SCO0031 <sup>m5</sup>     | SCJ4.12c                                                 | hypothetical protein                    | tgtcagtgctcgttcatatg       |
| SCO0268 <sup>m4m5m6</sup> | SCF1.10                                                  | hypothetical protein                    | tgtcagtggcgtgggcaatggttg   |
| SCO0558 <sup>m4m5</sup>   | SCF73.05c                                                | hypothetical protein SCF73.05c          | tgtcagtggcggatgcgaggccttcg |
| SCO0679 <sup>m4m6</sup>   | SCF91.39                                                 | hypothetical protein SCF91.39.          | tgtcagtgccggaacacgtccttg   |
| SCO1256 <sup>m4m6</sup>   | 2SCG18.03c                                               | hypothetical protein 2SCG18.03c         | tgtcagtggcggcgggtttactgg   |
| SCO1291 <sup>m5</sup>     | SCBAC36F5.02                                             | hypothetical protein SCBAC36F5.02       | tgtcagtggcgcctctacg        |
| SCO1334 <sup>m4m5m6</sup> | 2SCG61.16                                                | hypothetical protein                    | tgtcagtgcttgcccctaggccttg  |
| SCO2205 <sup>m4m6</sup>   | SC3H12.13c                                               | hypothetical protein SC3H12.13c         | tgtcagtggcggcagtaaaatag    |
| SCO2211 <sup>m4m5m6</sup> | SC10B7.06                                                | hypothetical protein SC10B7.06          | tgtcagtggcccgtgcgagggtgg   |
| SCO2738 <sup>m4m6</sup>   | SCC57A.09c                                               | hypothetical protein SCC57A.09c.        | tgtcagtccccaccggtaccgtcg   |
| SCO2791 <sup>m5m6</sup>   | SCC105.22c                                               | hypothetical protein SCC105.22c         | tgtcagtggccaatccccgtagg    |
| SCO2975 <sup>m5</sup>     | SCE50.03                                                 | hypothetical protein SCE50.03           | tgtcagtggcaggtgcgaggatg    |
| SCO3050 <sup>m4m5m6</sup> | SCBAC19G2.05c                                            | hypothetical protein                    | tgtcagtggcgggtgagacgggtgg  |
| SCO4611 <sup>m5</sup>     | SCD39.11                                                 | hypothetical protein SCD39.11           | tgtcagtggcggcctgcatcatg    |
| SCO6674 <sup>m4m5m6</sup> | SC5A7.24c                                                | hypothetical protein SC5A7.24c          | tgtcagtggcggcggcaagctgg    |
| SCO6735 <sup>m4m5m6</sup> | SC5F2A.18                                                | hypothetical protein                    | tgtcagtggcggcccgtacgggtgg  |
| SCO7634 <sup>m4m6</sup>   | SC10F4.07                                                | hypothetical protein SC10F4.07          | tgtcagtgggtgatggcagcctgg   |
| SCO7723 <sup>m5</sup>     | SC8D11.14c                                               | hypothetical protein SC8D11.14c         | tgtcagtgggtcccggcagg       |
| SCO7787 <sup>m5</sup>     | SC5E9.35c                                                | hypothetical protein                    | tgtcagtgttcatggcggacg      |
| 0.0.2                     | Conserved in organism other than Escherichia coli (1322) |                                         |                            |
| SCO0180 <sup>m6</sup>     | SCJ1.29c                                                 | conserved hypothetical protein SCJ1.29c | tgtcagtgcccccgctgccgtcg    |

|                                                                                                                                                                                           |                                                                                                                                                                                                                              |                                                                                                                                                                                                                                              |
|-------------------------------------------------------------------------------------------------------------------------------------------------------------------------------------------|------------------------------------------------------------------------------------------------------------------------------------------------------------------------------------------------------------------------------|----------------------------------------------------------------------------------------------------------------------------------------------------------------------------------------------------------------------------------------------|
| SCO0563 <sup>m5</sup> SCF73.10c<br>SCO1653 <sup>m5</sup> SCI41.36<br>SCO1731 <sup>m4m5m6</sup> SCI11.20c                                                                                  | conserved hypothetical protein SCF73.10c<br>conserved hypothetical protein SCI41.36<br>conserved hypothetical protein                                                                                                        | tgtcagtgggacctcgtacg<br>tgtcagtgcccgccgtaagg<br>tgtcagtggcggttgtcacg<br>tgtcagtggcgggtgccaccctgg<br>tgtcagtggggctcgggcacgatg<br>tgtcagtggcgcagtgcaactatcg<br>tgtcagtggcgtgggtgcaccgtgg<br>tgtcagtggttactgcaaccatg<br>tgtcagtggcaacaattgtcagg |
| SCO2204 <sup>m5</sup> SC3H12.12<br>SCO4113 <sup>m4m6</sup> SCD17A.05c<br>SCO4803 <sup>m4m6</sup> SCD63A.14<br>SCO6120 <sup>m5</sup> SC9B2.07<br>SCO7098 <sup>m5</sup> SC3A4.24c           | hypothetical protein SC3H12.12<br>conserved hypothetical protein<br>conserved hypothetical protein<br>hypothetical protein SC9B2.07<br>conserved hypothetical protein SC3A4.24c.                                             |                                                                                                                                                                                                                                              |
| 1.2.1                                                                                                                                                                                     | Chromosome replication (8)                                                                                                                                                                                                   |                                                                                                                                                                                                                                              |
| SCO2064 <sup>m4</sup> SC4G6.33c dnaE<br>SCO3878 <sup>m4m6</sup> dnaN SCH18.15c<br>SCO3877<br>SCO3876 recF SCH18.13c                                                                       | DNA polymerase III alpha chain<br>DNA polymerase III, beta chain<br>putative 6-phosphogluconate dehydrogenase<br>DNA replication protein                                                                                     | tgtcagtcccaggcatagacttcg<br>tgtcagtgggggtgcgtcagactgg                                                                                                                                                                                        |
| 1.5.0                                                                                                                                                                                     | Transport/binding proteins (520)                                                                                                                                                                                             |                                                                                                                                                                                                                                              |
| SCO1965 <sup>m5</sup> SCC54.25c<br>SCO2373 <sup>m4m6</sup> tcmA SCC8A.31c SC<br>SCO4963 <sup>m5</sup> 2SCK31.23<br>SCO5451 <sup>m4m5m6</sup> SC3D11.08c<br>SCO6805 <sup>m5</sup> SC1A2.14 | putative export associated protein<br>tetracenomycin C efflux protein. tetracenomycin C resistance<br>putative ABC transporter ATP-binding protein<br>putative ABC transporter<br>putative integral membrane efflux protein. | tgtcagtgccctgcgtagg<br>tgtcagtactgactcgtgaattgg<br>tgtcagtggctgcagcctaacg<br>tgtcagtggcaaacctaggctcg<br>tgtcagtggcccgtggcatg                                                                                                                 |
| 1.6.1                                                                                                                                                                                     | Adaptations, atypical conditions (25)                                                                                                                                                                                        |                                                                                                                                                                                                                                              |
| SCO4505 <sup>m5</sup> scoF2 SCD35.12c                                                                                                                                                     | <b>cold shock</b> protein                                                                                                                                                                                                    | tgtcagtggctgccactagg                                                                                                                                                                                                                         |
| 2.1.1                                                                                                                                                                                     | Degradation of DNA (13)                                                                                                                                                                                                      |                                                                                                                                                                                                                                              |
| SCO6341 <sup>m5m6</sup> SC3A7.09                                                                                                                                                          | putative exonuclease                                                                                                                                                                                                         | tgtcagtgcccccggtaggttg                                                                                                                                                                                                                       |
| 2.2.3                                                                                                                                                                                     | DNA - replication, repair, restr./modific'n (85)                                                                                                                                                                             |                                                                                                                                                                                                                                              |
| SCO1343 <sup>m5</sup> ung 2SCG61.25c<br>SCO1380 <sup>m4m6</sup> SC10A9.22c                                                                                                                | uracil-DNA glycosylase (EC 3.2.2.-)<br>putative DNA damage inducible protein, N-terminal region similar to SW:DINP_ECOLI (EMBL:D83536) Escherichia coli DNA-damage-inducible protein P DinP.                                 | tgtcagtggctcggcggtagg<br>tgtcagtggcgtagggcagcatcg                                                                                                                                                                                            |

|                                             |                                                                                                                                                                                                                                                                                                                  |                            |
|---------------------------------------------|------------------------------------------------------------------------------------------------------------------------------------------------------------------------------------------------------------------------------------------------------------------------------------------------------------------|----------------------------|
| SCO1475 <sup>m5</sup> SCL6.32c              | putative primosomal protein n', similar to SW:PRIA_ECOLI (EMBL:M33293) Escherichia coli primosomal protein n' (replication factor Y) PriA                                                                                                                                                                        | tgtcagtggcctttgcgagaatg    |
| SCO1966 <sup>m4m5m6</sup> SCC54.26c uvrB SC | ABC excision nuclease subunit B excinuclease ABC subunit B (fragment), highly similar to SW:UVRB_BACSU (EMBL:AF017113) Bacillus subtilis excinuclease ABC subunit B (DinA protein) UvrB or DinA or Uvr aa; fasta scores: opt: 2591 Z-score: 2687.6 bits: 507.5 E(): 4.3e-142; 63.667% identity in 600 aa overlap | tgtcagtgcgggggtcgtacgggtgg |
| SCO2003 <sup>m4m5m6</sup> SC7H2.17c polA    | DNA polymerase I                                                                                                                                                                                                                                                                                                 | tgtcagtggcacgtggcaggatcg   |
| SCO3351 <sup>m4m5</sup> SCE94.02            | putative DNA repair protein, similar to many eg. SW:RADA_ECOLI RadA, DNA repair protein (mechanism unknown) from Escherichia coli (460 aa) fasta scores; opt: 1218, z-score: 1309.3, E(): 0, (41.4% identity in 452 aa overlap)                                                                                  | tgtcagtgggggcggttacggttcg  |
| SCO3434 <sup>m4m6</sup> SCE36.01 SCE9.41    | putative DNA polymerase I hypothetical protein                                                                                                                                                                                                                                                                   | tgtcagtcccgctgcgacactcg    |
| SCO3541 <sup>m4m5m6</sup> SCH5.03c          | putative DNA polymerase, len: 401 aa; limited region of similarity to many DNA polymerase III subunits e.g. SW:DP3X_SALTY DNA polymerase III subunits gamma and tau from Salmonella typhimurium (642 aa) fasta scores; opt: 327, z-score: 338.5, E(): 1.5e-11, (32.1% identity in 246 aa overlap)                | tgtcagtgccgccccgcacaatgg   |
| SCO3540 SCH5.02c slpD                       | proteinase (putative secreted protein).                                                                                                                                                                                                                                                                          |                            |
| SCO3874 <sup>m5</sup> gyrB SCH18.11c        | DNA gyrase subunit B                                                                                                                                                                                                                                                                                             | tgtcagtggtagcggttagaatg    |
| SCO3873 gyrA SCH18.10c                      | DNA gyrase subunit A                                                                                                                                                                                                                                                                                             |                            |
| SCO5761 <sup>m4m5m6</sup> SC7C7.16c         | putative ATP-dependent DNA helicase, len: 1690 aa; highly similar to e.g. LHR_ECOLI probable atp-dependent helicase lhr (EC 3.6.1.-) (1538 aa), fasta scores; opt: 2361 z-score: 3018.1 E(): 0, 48.6% identity in 1435 aa overlap                                                                                | tgtcagtggccgggtgcacgatgg   |
| SCO5760                                     | DNA glycosylase involved in DNA repair                                                                                                                                                                                                                                                                           |                            |

|                                          |                                                                                                                                                                                                                                                     |                            |
|------------------------------------------|-----------------------------------------------------------------------------------------------------------------------------------------------------------------------------------------------------------------------------------------------------|----------------------------|
| SCO5802 <sup>m4m6</sup> SC4H2.23         | putative ATP-dependent helicase, probable ATP-dependent helicase, len: 664 aa; similar to e.g. DING_ECOLI P27296 probable ATP-dependent helicase dinG (716 aa), fasta scores opt: 272 z-score: 409.8 E(): 1.3e-15, 26.5% identity in 686 aa overlap | tgtcagtcccgggccgtaggggtgg  |
| SCO5815 <sup>m4m5m6</sup>                | putative ATP-dependent DNA helicase, similar in N-terminal half to many e.g. RECQ_ECOLIP1 5043 atp-dependent dna helicase recq (607 aa), fasta score s; opt: 546 z-score: 615.9 E(): 4.1e-27, 35.9% identity in 362 aa overlap                      | tgtcagtgccatcggggttgcattgg |
| SCO5817                                  | putative DNA hydrolase with mutT domain                                                                                                                                                                                                             |                            |
| SCO5836 <sup>m4m5m6</sup> SC9B10.03c     | DNA gyrase-like protein                                                                                                                                                                                                                             | tgtcagtgccgcagtcacacatgg   |
| SCO6084 <sup>m4m5m6</sup> SCBAC1A6.08    | putative DNA polymerase, len: 244 aa; similar to SW:DP3E_ECOLI (EMBL:X04027) Escherichia coli DNA polymerase III, epsilon chain (EC 2.7.7.7) DnaQ, 243 aa; fasta scores: opt: 137 z-score: 167.9 E(): 0.089; 26.2% identity in 206 aa overlap,      | tgtcagtggcccgtgcgagggtgg   |
| 2.2.7                                    | Phospholipids (14)                                                                                                                                                                                                                                  |                            |
| SCO6445 <sup>m4m5m6</sup> SC9B5.12       | putative inositol monophosphatase                                                                                                                                                                                                                   | tgtcagtggcgcggtgctctcatgg  |
| 3.2.6                                    | Heme, porphyrin (16)                                                                                                                                                                                                                                |                            |
| SCO4469 <sup>m4m5m6</sup> hemL SCD65.12  | glutamate-1-semialdehyde 2,1-aminomutase                                                                                                                                                                                                            | tgtcagtgacctccccacgggtcg   |
| SCO4470 SCD65.13                         | putative phosphoglycerate mutase                                                                                                                                                                                                                    |                            |
| SCO5859 <sup>m4m5m6</sup> hemH SC9B10.26 | ferrochelatase                                                                                                                                                                                                                                      | tgtcagtgccgggtggcaggatcg   |
| 4.1.6                                    | Gram +ve membrane (836)                                                                                                                                                                                                                             |                            |
| SCO4069 <sup>m4m6</sup> SCD25.05         | putative integral membrane protein                                                                                                                                                                                                                  | tgtcagtgccgggtgccacagtgg   |
| SCO4811 <sup>m5</sup> SCD63A.22          | putative integral membrane protein                                                                                                                                                                                                                  | tgtcagtgcggcggactcacg      |
| SCO6538 <sup>m6</sup> SC5C7.23           | putative integral membrane protein                                                                                                                                                                                                                  | tgtcagtctcacaggggtgttcg    |
| SCO6794 <sup>m4m5</sup> SC1A2.03 cvnA7   | putative membrane protein.                                                                                                                                                                                                                          | tgtcagtgtccgtcgggacgtag    |
| SCO7763 <sup>m4m5m6</sup> SC5E9.11       | putative membrane protein                                                                                                                                                                                                                           | tgtcagtgcctcctgtcagcatgg   |
| 4.2.2                                    | Ribosomal proteins - synthesis, modification (62)                                                                                                                                                                                                   |                            |
| SCO3906 <sup>m4m6</sup> SCH24.28 rpsF    | putative 30S ribosomal protein S6                                                                                                                                                                                                                   | tgtcagtgggtcctggtttactcg   |
| SCO3907 SCH24.29 ssb                     | putative single-strand DNA-binding protein                                                                                                                                                                                                          |                            |

|                                             |                                                                              |                           |
|---------------------------------------------|------------------------------------------------------------------------------|---------------------------|
| SCO3908 SCH24.30 rpsR                       | putative 30S ribosomal protein S18                                           |                           |
| SCO3909 SCH24.31 rplI                       | 50S ribosomal protein L9                                                     |                           |
| 6.3.2                                       | AraC (33)                                                                    |                           |
| SCO0287 <sup>m6</sup> SCF85.15              | putative regulatory protein                                                  | tgtcagtggcgcaccgtcactcg   |
| 6.3.6                                       | LysR (38)                                                                    |                           |
| SCO3919 <sup>m6</sup> SCQ11.02c abaB        | putative lysR-family transcriptional regulator                               | tgtcagtgtccaatcaccgtag    |
| 6.5.0                                       | Others (237)                                                                 |                           |
| SCO2105 <sup>m4m5m6</sup> SC2C1A.01c SC4A10 | putative transcriptional regulatory protein (fragment). hypothetical protein | tgtcagtgccaggtggcaggctgg  |
| 7.0.0                                       | Not classified (included putative assignments) (565)                         |                           |
| SCO0278 <sup>m5</sup> SCF85.06 MutT         | domain containing protein                                                    | tgtcagtggcccctgccaggatg   |
| SCO3000 <sup>m5</sup> SCE33.02c             | putative phosphatase                                                         | tgtcagtggcgccgggtacg      |
|                                             | Not known according to classification                                        |                           |
| SCP1.106 <sup>m4m6</sup>                    |                                                                              | tgtcagtcgtccgtcctcgcctcg  |
| SCP1.204c <sup>m4m5m6</sup>                 |                                                                              | tgtcagtgggggttcgtaggggtgg |
