# Supplementary material for: SIGffRid: A tool to search for sigma factor binding sites in bacterial genomes using comparative approach and biologically driven statistics
Source: Springer Nature journal article supplement (doi:10.1186/1471-2105-9-73), 2008-01-31
Supplement: 12859_2007_2058_MOESM5_ESM.pdf [file 12859_2007_2058_MOESM5_ESM.pdf]

**Table 6:** SIGffRid results compared with known SFBS motifs in *E. coli*/*S. typhimurium* on one hand, and *B. subtilis*/*B. licheniformis* on the other hand

|   |                                                              |
|---|--------------------------------------------------------------|
| ■ | $\sigma$ factor: name [known/deduced consensus if available] |
| ■ | known promoters (when no consensus can be clearly deduced)   |
| □ | SIGffRid output motifs                                       |

Motifs are presented as follow: DNA\_motif (R ratio, LRT likelihood ratio test).  
(for *E. coli*:  $R \geq 0.50$ ,  $LRT \geq 3.84$ ; for *S. typhimurium*:  $R \geq 0.48$ ,  $LRT \geq 3.84$ )

SIGffRid results for *Escherichia coli*/*Salmonella typhimurium* pair.

| $\sigma$ factor: $\sigma^{70}$ <i>ttgacan</i> <sub>16,18</sub> <i>tataat</i> [1] |                                                                                                                                    |
|----------------------------------------------------------------------------------|------------------------------------------------------------------------------------------------------------------------------------|
| SIGffRid output motifs (spacer range: 14 to 20)                                  |                                                                                                                                    |
| <i>E. coli</i>                                                                   | <i>S. typhimurium</i>                                                                                                              |
| <i>tggnan</i> <sub>16,18</sub> <i>tataat</i> (0.52, 6.40)                        | <i>tn<sub>2</sub>cn</i> <sub>17,19</sub> <i>tataatg</i> (0.52, 21.86)<br><i>tngn</i> <sub>19,20</sub> <i>tataatg</i> (0.49, 12.72) |
| <i>tggnan</i> <sub>15,18</sub> <i>tataat</i> (0.53, 7.18)                        |                                                                                                                                    |
| <i>tn<sub>2</sub>cn</i> <sub>17,19</sub> <i>tataatg</i> (0.54, 11.30)            |                                                                                                                                    |
| $\sigma$ factor: RpoS ? <i>n<sub>7</sub>ctatact</i> [2]*                         |                                                                                                                                    |
| SIGffRid output motifs (spacer range: 14 to 20)                                  |                                                                                                                                    |
| <i>E. coli</i>                                                                   | <i>S. typhimurium</i>                                                                                                              |
| <i>tn<sub>2</sub>an</i> <sub>17,19</sub> <i>tatact</i> (0.73, 10.10)             | <i>tn<sub>2</sub>an</i> <sub>17,19</sub> <i>tatact</i> (0.49, 41.75)                                                               |
| <i>tn<sub>3</sub>an</i> <sub>17,19</sub> <i>tatact</i> (0.51, 15.40)             |                                                                                                                                    |
| <i>tn<sub>3</sub>an</i> <sub>16,18</sub> <i>tatact</i> (0.51, 15.43)             |                                                                                                                                    |
| <i>cn<sub>2</sub>gn</i> <sub>17,19</sub> <i>ctataat</i> (0.59, 10.69)            |                                                                                                                                    |
| <i>tn<sub>1</sub>tn</i> <sub>18,20</sub> <i>tatact</i> (0.55, 6.79)              |                                                                                                                                    |
| <i>tn<sub>3</sub>tn</i> <sub>16,18</sub> <i>tatactg</i> (0.50, 6.36)             | <i>tn<sub>3</sub>tn</i> <sub>16,18</sub> <i>tatactg</i> (0.50, 16.79)                                                              |

\*No -35 box is clearly defined.

| Motif putatively recognized by a transcription factor                |                                                                                                                                                                                                                                                                   |
|----------------------------------------------------------------------|-------------------------------------------------------------------------------------------------------------------------------------------------------------------------------------------------------------------------------------------------------------------|
| SIGffRid output motifs (spacer range: 14 to 20)                      |                                                                                                                                                                                                                                                                   |
| <i>E. coli</i>                                                       | <i>S. typhimurium</i>                                                                                                                                                                                                                                             |
| <i>tggn</i> <sub>19,21</sub> <i>tacaat</i> (0.53, 9.24)              | <i>tataan</i> <sub>14,17</sub> <i>ttattt</i> (0.66, 13.05, x3)<br><i>tn<sub>3</sub>tn</i> <sub>14,16</sub> <i>gtatact</i> (0.53, 12.70)<br><i>tnan</i> <sub>16,18</sub> <i>gtatact</i> (0.74, 20.21)<br><i>tgtgatn</i> <sub>11,13</sub> <i>ttta</i> (0.54, 14.29) |
| <i>tn<sub>3</sub>tn</i> <sub>14,16</sub> <i>gtatact</i> (0.62, 6.84) |                                                                                                                                                                                                                                                                   |
| <i>anan</i> <sub>15,17</sub> <i>tgtat</i> [ag] (0.54, 39.94)         |                                                                                                                                                                                                                                                                   |
| <i>anan</i> <sub>14,16</sub> <i>gtataat</i> (0.75, 8.17)             |                                                                                                                                                                                                                                                                   |
| <i>tngn</i> <sub>18,19</sub> <i>gtataat</i> (0.60, 6.67)             |                                                                                                                                                                                                                                                                   |

SIGffRid results for *Bacillus subtilis*/*Bacillus licheniformis* pair.  
(for *B. subtilis*:  $R \geq 0.51$ ,  $LRT \geq 3.84$ ; for *B. licheniformis*:  $R \geq 0.52$ ,  $LRT \geq 3.84$ )

| $\sigma$ factor: SigA <i>ttgacan</i> <sub>16,18</sub> <i>tataat</i> [3]         |                                                                                 |
|---------------------------------------------------------------------------------|---------------------------------------------------------------------------------|
| SIGffRid output motifs (spacer range: 14 to 20)                                 |                                                                                 |
| <i>B. subtilis</i>                                                              | <i>B. licheniformis</i>                                                         |
| <i>ttgan</i> <sub>18,19</sub> <i>tataat</i> (0.77, 43.47)                       | <i>ttgan</i> <sub>18,20</sub> <i>tataat</i> (0.79, 63.87)                       |
| <i>ttgacn</i> <sub>18,19</sub> <i>taaaat</i> (0.76, 12.85)                      | <i>ttgacn</i> <sub>17,19</sub> <i>taaaat</i> (0.66, 11.65)                      |
| <i>ttgacn</i> <sub>18,20</sub> <i>ataat</i> (0.71, 43.15)                       | <i>ttgacn</i> <sub>17,19</sub> <i>tata</i> (0.55, 53.42)                        |
| <i>ttn</i> <sub>2</sub> <i>cn</i> <sub>18,19</sub> <i>tataatt</i> (0.68, 23.73) | <i>ttn</i> <sub>2</sub> <i>cn</i> <sub>18,20</sub> <i>tataat</i> (0.53, 70.88)  |
| <i>ttn</i> <sub>2</sub> <i>cn</i> <sub>17,19</sub> <i>tataata</i> (0.57, 30.48) | <i>ttn</i> <sub>2</sub> <i>cn</i> <sub>17,20</sub> <i>tataat</i> (0.52, 83.85)  |
| <i>ttgacn</i> <sub>17,19</sub> <i>tataa</i> (0.67, 29.71)                       | <i>ttgacn</i> <sub>19,21</sub> <i>taata</i> (0.68, 22.84)                       |
| <i>ttgacn</i> <sub>16,18</sub> <i>tataa</i> (0.57, 18.10)                       | <i>ttgacn</i> <sub>17,20</sub> <i>tataa</i> (0.66, 32.51)                       |
|                                                                                 | <i>ttgacan</i> <sub>18,19</sub> <i>anant</i> (0.53, 42.90)                      |
|                                                                                 | <i>ttgacaan</i> <sub>17,18</sub> <i>anant</i> (0.83, 30.80)                     |
|                                                                                 | <i>ttgacan</i> <sub>17,18</sub> <i>tan</i> <sub>2</sub> <i>a</i> (0.58, 41.75)  |
|                                                                                 | <i>ttgaan</i> <sub>17,18</sub> <i>tataat</i> (0.83, 12.46)                      |
| <i>ttgn</i> <sub>18,20</sub> <i>ctataat</i> (0.67, 28.56)                       | <i>ttgn</i> <sub>18,20</sub> <i>ttataat</i> (0.72, 41.17)                       |
|                                                                                 | <i>tn</i> <sub>2</sub> <i>an</i> <sub>16,18</sub> <i>ctataat</i> (0.55, 26.28)  |
|                                                                                 | <i>antn</i> <sub>18,21</sub> <i>ctataat</i> (0.53, 23.48)                       |
| <i>ttgn</i> <sub>19,20</sub> <i>tacaata</i> (0.52, 12.68)                       | <i>ttgn</i> <sub>19,20</sub> <i>tacaata</i> (0.81, 19.48)                       |
|                                                                                 | <i>tn</i> <sub>3</sub> <i>an</i> <sub>17,18</sub> <i>tacaata</i> (0.52, 12.68)  |
|                                                                                 | <i>tn</i> <sub>3</sub> <i>an</i> <sub>16,18</sub> <i>tataata</i> (0.54, 23.82)  |
| <i>ttgacn</i> <sub>17,19</sub> <i>ataat</i> (0.62, 25.62)                       | <i>tn</i> <sub>3</sub> <i>an</i> <sub>17,19</sub> <i>tataata</i> (0.55, 24.40)  |
| <i>gacan</i> <sub>16,18</sub> <i>tataat</i> (0.60, 16.93)                       | <i>ttgacn</i> <sub>17,19</sub> <i>ataat</i> (0.60, 22.95)                       |
|                                                                                 | <i>gacan</i> <sub>16,19</sub> <i>tataat</i> (0.59, 13.63)                       |
|                                                                                 | <i>gacan</i> <sub>15,18</sub> <i>tataat</i> (0.57, 13.37)                       |
| <i>ttgn</i> <sub>18,20</sub> <i>tataat</i> (0.58, 79.09)                        | <i>ttgn</i> <sub>19,21</sub> <i>tataat</i> (0.62, 98.65)                        |
|                                                                                 | <i>ttgn</i> <sub>18,21</sub> <i>tataat</i> (0.59, 99.07)                        |
| <i>tnanan</i> <sub>15,17</sub> <i>tataat</i> (0.51, 39.02)                      | <i>tngncn</i> <sub>17,19</sub> <i>tataat</i> (0.61, 50.60)                      |
| <i>tngn</i> <sub>19,21</sub> <i>tataata</i> (0.59, 51.90)                       | <i>tngncn</i> <sub>17,18</sub> <i>tataat</i> (0.74, 48.24)                      |
|                                                                                 | <i>tgn</i> <sub>16,18</sub> <i>tataat</i> (0.64, 47.86)                         |
| <i>tn</i> <sub>2</sub> <i>cn</i> <sub>18,20</sub> <i>tataata</i> (0.57, 30.48)  | <i>tn</i> <sub>2</sub> <i>can</i> <sub>16,18</sub> <i>tataat</i> (0.57, 51.72)  |
| <i>tnan</i> <sub>17,19</sub> <i>tataat</i> [ <i>ga</i> ] (0.53, 76.73)          | <i>tnan</i> <sub>16,20</sub> <i>tataatg</i> (0.56, 44.52)                       |
| <i>tn</i> <sub>2</sub> <i>acn</i> <sub>17,19</sub> <i>tataat</i> (0.51, 47.73)  | <i>tn</i> <sub>2</sub> <i>acn</i> <sub>17,19</sub> <i>tataat</i> (0.63, 61.48)  |
|                                                                                 | <i>tn</i> <sub>2</sub> <i>acn</i> <sub>17,18</sub> <i>tataat</i> (0.68, 49.09)  |
|                                                                                 | <i>ttn</i> <sub>2</sub> <i>cn</i> <sub>18,18</sub> <i>tataatg</i> (0.70, 13.88) |
|                                                                                 | <i>ttn</i> <sub>2</sub> <i>an</i> <sub>16,19</sub> <i>tataatg</i> (0.56, 16.61) |
|                                                                                 | <i>ttn</i> <sub>2</sub> <i>an</i> <sub>17,19</sub> <i>tataata</i> (0.64, 14.71) |
| <i>ttn</i> <sub>2</sub> <i>cn</i> <sub>16,18</sub> <i>tataata</i> (0.51, 21.54) |                                                                                 |
| <i>ttgacan</i> <sub>14,15</sub> <i>tn</i> <sub>2</sub> <i>ta</i> (0.52, 36.05)  |                                                                                 |
| <i>ttgacan</i> <sub>16,17</sub> <i>ataa</i> (0.57, 10.36)                       |                                                                                 |
| <i>ttn</i> <sub>2</sub> <i>tn</i> <sub>17,19</sub> <i>tataat</i> (0.52, 22.78)  |                                                                                 |

|                                                                                                                                                                                                                                                                                                                                                                                                                                                                                                                                                                                                                                                                                                                                                                                                                                                                                                                                                                                                           |                                                                                                                                                                                                                                                                                                                                                                                                                                                                                                                                                                                                                                                                                                                                                                                                                                                                                                                                                                                                                                                                                                                                                                                                                                                                                                                                                                                                                                                                                                                                                                                                                                                                                                                                                                                                                                                                                                                                                                                                                                                                                                                                                  |
|-----------------------------------------------------------------------------------------------------------------------------------------------------------------------------------------------------------------------------------------------------------------------------------------------------------------------------------------------------------------------------------------------------------------------------------------------------------------------------------------------------------------------------------------------------------------------------------------------------------------------------------------------------------------------------------------------------------------------------------------------------------------------------------------------------------------------------------------------------------------------------------------------------------------------------------------------------------------------------------------------------------|--------------------------------------------------------------------------------------------------------------------------------------------------------------------------------------------------------------------------------------------------------------------------------------------------------------------------------------------------------------------------------------------------------------------------------------------------------------------------------------------------------------------------------------------------------------------------------------------------------------------------------------------------------------------------------------------------------------------------------------------------------------------------------------------------------------------------------------------------------------------------------------------------------------------------------------------------------------------------------------------------------------------------------------------------------------------------------------------------------------------------------------------------------------------------------------------------------------------------------------------------------------------------------------------------------------------------------------------------------------------------------------------------------------------------------------------------------------------------------------------------------------------------------------------------------------------------------------------------------------------------------------------------------------------------------------------------------------------------------------------------------------------------------------------------------------------------------------------------------------------------------------------------------------------------------------------------------------------------------------------------------------------------------------------------------------------------------------------------------------------------------------------------|
| <p><i>tgn<sub>2</sub>an<sub>16,18</sub>tataat</i> (0.54, 40.24)<br/> <i>tngncn<sub>17,19</sub>tataata</i> (0.75, 24.50)<br/> <i>ttgcn<sub>18,20</sub>tataat</i> (0.53, 20.08)</p> <p><i>ttgan<sub>17,18</sub>ctataa</i> (0.54, 11.53)<br/> <i>tgn<sub>2</sub>an<sub>15,17</sub>tataat</i> (0.53, 9.56)<br/> <i>tngn<sub>18,20</sub>gtataat</i> (0.66, 37.73)</p> <p><i>tgn<sub>2</sub>tn<sub>16,17</sub>tataat</i> (0.52, 32.43)<br/> <i>antngn<sub>19,21</sub>tataat</i> (0.59, 37.05)<br/> <i>tn<sub>2</sub>tn<sub>17,19</sub>tataata</i> (0.52, 22.78)<br/> <i>tntnan<sub>16,18</sub>ttataat</i> (0.61, 23.75)<br/> <i>tntn<sub>18,20</sub>tataatag</i> (0.76, 27.76)</p> <p><i>gttgacn<sub>18,20</sub>tan<sub>2</sub>a</i> (0.59, 40.73)<br/> <i>gttgacan<sub>18,19</sub>an<sub>2</sub>at</i> (0.54, 11.35)</p> <p><i>ganan<sub>17,18</sub>tataat</i> (0.63, 24.93)</p> <p><i>tntn<sub>16,18</sub>gttataat</i> (0.59, 16.73)</p> <p><i>attgacan<sub>17,19</sub>an<sub>2</sub>at</i> (0.56, 27.34)</p> | <p><i>tgn<sub>2</sub>an<sub>16,18</sub>tataat</i> (0.53, 30.83)<br/> <i>tngncn<sub>17,19</sub>tataata</i> (0.76, 26.33)<br/> <i>ttgcn<sub>18,20</sub>tataat</i> (0.56, 23.09)<br/> <i>tn<sub>2</sub>cn<sub>18,20</sub>tataata</i> (0.53, 36.66)<br/> <i>tn<sub>2</sub>cn<sub>16,18</sub>ttataata</i> (0.65, 21.65)<br/> <i>tn<sub>2</sub>an<sub>17,19</sub>ttataat</i> (0.52, 34.59)<br/> <i>tn<sub>2</sub>an<sub>16,19</sub>tataatt</i> (0.52, 30.55)<br/> <i>antnan<sub>18,20</sub>tataat</i> (0.54, 21.75)<br/> <i>ttgcaan<sub>16,17</sub>tana</i> (0.53, 18.09)<br/> <i>ttgan<sub>18,20</sub>atataa</i> (0.53, 9.19)<br/> <i>tgn<sub>2</sub>an<sub>16,18</sub>tataata</i> (0.67, 16.36)<br/> <i>tngn<sub>18,20</sub>ttataat</i> (0.53, 36.81)<br/> <i>tngn<sub>19,21</sub>tataatt</i> (0.59, 29.85)</p> <p><i>ttan<sub>16,19</sub>tataata</i> (0.53, 7.32)<br/> <i>tntnan<sub>17,19</sub>tataat</i> (0.57, 39.73)<br/> <i>tnan<sub>17,20</sub>tataat[ag]</i> (0.58, 74.99)<br/> <i>tnan<sub>16,20</sub>tataata</i> (0.58, 40.62)<br/> <i>tnan<sub>16,19</sub>tataatt</i> (0.59, 34.69)<br/> <i>tnan<sub>17,19</sub>tataatt</i> (0.58, 26.66)<br/> <i>tnanan<sub>15,17</sub>tataat</i> (0.59, 34.03)<br/> <i>tn<sub>2</sub>an<sub>16,20</sub>tataat[ag]</i> (0.53, 73.84)</p> <p><i>gtn<sub>2</sub>an<sub>18,20</sub>tataat</i> (0.53, 20.13)</p> <p><i>acntn<sub>14,16</sub>tataat</i> (0.63, 34.78)<br/> <i>tan<sub>2</sub>gn<sub>19,21</sub>tataat</i> (0.56, 18.90)<br/> <i>an<sub>2</sub>gn<sub>18,19</sub>ttataat</i> (0.59, 21.30)<br/> <i>tn<sub>2</sub>tn<sub>16,19</sub>gttataa</i> (0.54, 24.08)<br/> <i>tn<sub>2</sub>tgn<sub>18,20</sub>tataat</i> (0.53, 36.95)<br/> <i>tn<sub>2</sub>tgn<sub>19,20</sub>tataat</i> (0.55, 32.18)<br/> <i>tattgacn<sub>17,20</sub>anant</i> (0.61, 17.11)<br/> <i>atn<sub>2</sub>an<sub>18,20</sub>tataat</i> (0.54, 28.27)<br/> <i>tattgacn<sub>18,20</sub>an<sub>2</sub>at</i> (0.62, 19.88)<br/> <i>tattgacn<sub>18,20</sub>anant</i> (0.64, 17.88)<br/> <i>tattgacan<sub>18,19</sub>an<sub>3</sub>t</i> (0.68, 14.96)<br/> <i>tattgacan<sub>19,20</sub>tn<sub>2</sub>t</i> (0.54, 8.14)</p> |
| <b><math>\sigma</math> factor: SigW <i>tgaaacn<sub>16,17</sub>cgta</i> [4]</b>                                                                                                                                                                                                                                                                                                                                                                                                                                                                                                                                                                                                                                                                                                                                                                                                                                                                                                                            |                                                                                                                                                                                                                                                                                                                                                                                                                                                                                                                                                                                                                                                                                                                                                                                                                                                                                                                                                                                                                                                                                                                                                                                                                                                                                                                                                                                                                                                                                                                                                                                                                                                                                                                                                                                                                                                                                                                                                                                                                                                                                                                                                  |
| <b>SIGffRid output motifs (spacer range: 14 to 20)</b>                                                                                                                                                                                                                                                                                                                                                                                                                                                                                                                                                                                                                                                                                                                                                                                                                                                                                                                                                    |                                                                                                                                                                                                                                                                                                                                                                                                                                                                                                                                                                                                                                                                                                                                                                                                                                                                                                                                                                                                                                                                                                                                                                                                                                                                                                                                                                                                                                                                                                                                                                                                                                                                                                                                                                                                                                                                                                                                                                                                                                                                                                                                                  |
| <i>B. subtilis</i>                                                                                                                                                                                                                                                                                                                                                                                                                                                                                                                                                                                                                                                                                                                                                                                                                                                                                                                                                                                        | <i>B. licheniformis</i>                                                                                                                                                                                                                                                                                                                                                                                                                                                                                                                                                                                                                                                                                                                                                                                                                                                                                                                                                                                                                                                                                                                                                                                                                                                                                                                                                                                                                                                                                                                                                                                                                                                                                                                                                                                                                                                                                                                                                                                                                                                                                                                          |
| <i>tgaaacn<sub>16,17</sub>cgtat</i> (0.74, 17.71)<br>(found 15 times)                                                                                                                                                                                                                                                                                                                                                                                                                                                                                                                                                                                                                                                                                                                                                                                                                                                                                                                                     | <i>tgaaacn<sub>16,17</sub>cgta</i> (0.69, 22.09)<br>(found 18 times)                                                                                                                                                                                                                                                                                                                                                                                                                                                                                                                                                                                                                                                                                                                                                                                                                                                                                                                                                                                                                                                                                                                                                                                                                                                                                                                                                                                                                                                                                                                                                                                                                                                                                                                                                                                                                                                                                                                                                                                                                                                                             |

| Motif putatively recognized by transcription factors                            |                                                                                |
|---------------------------------------------------------------------------------|--------------------------------------------------------------------------------|
| SIGffRid output motifs (spacer range: 14 to 20)                                 |                                                                                |
| <i>B. subtilis</i>                                                              | <i>B. licheniformis</i>                                                        |
| <i>attgacan</i> <sub>13,15</sub> <i>tn</i> <sub>2</sub> <i>ta</i> (0.60, 21.70) | <i>attgacan</i> <sub>14,15</sub> <i>tn</i> <sub>2</sub> <i>t</i> (0.53, 8.05)  |
| <i>atttn</i> <sub>13,15</sub> <i>tataat</i> (0.52, 22.36)                       | <i>attttn</i> <sub>12,15</sub> <i>tataat</i> (0.58, 16.05)                     |
|                                                                                 | <i>atttn</i> <sub>13,17</sub> <i>tataat</i> (0.54, 29.78)                      |
|                                                                                 | <i>atttn</i> <sub>13,16</sub> <i>tataat</i> (0.57, 29.45)                      |
|                                                                                 | <i>atttn</i> <sub>12,16</sub> <i>tataat</i> (0.54, 29.33)                      |
| <i>ttn</i> <sub>13,15</sub> <i>tataata</i> (0.56, 27.57)                        |                                                                                |
| <i>tataatan</i> <sub>12,14</sub> <i>aaa</i> (0.56, 11.98)                       | <i>tataat</i> [ <i>tg</i> ] <i>n</i> <sub>13,17</sub> <i>aaa</i> (0.56, 20.28) |
|                                                                                 | <i>aan</i> <sub>13,17</sub> <i>tataatg</i> (0.56, 11.08)                       |
| <i>tataatn</i> <sub>14,16</sub> <i>ataa</i> (0.52, 10.23)                       | <i>tataatn</i> <sub>14,16</sub> <i>ataa</i> (0.64, 9.31)                       |
| <i>tttn</i> <sub>16,18</sub> <i>tataata</i> (0.53, 12.05)                       | <i>ttttn</i> <sub>12,16</sub> <i>tataat</i> (0.55, 8.28)                       |
| <i>cntn</i> <sub>19,21</sub> <i>tataat</i> (0.54, 31.42)                        | <i>cntnan</i> <sub>15,19</sub> <i>tataat</i> (0.67, 52.77)                     |
| <i>gn</i> <sub>2</sub> <i>gn</i> <sub>14,18</sub> <i>tegtccct</i> (0.58, 18.83) |                                                                                |
| <i>gn</i> <sub>2</sub> <i>gn</i> <sub>15,17</sub> <i>tegtccct</i> (0.64, 16.57) |                                                                                |
| <i>gn</i> <sub>2</sub> <i>gn</i> <sub>14,16</sub> <i>tegtccct</i> (0.53, 12.78) |                                                                                |
| <i>ggn</i> <sub>17,20</sub> <i>cgteccct</i> (0.53, 12.85)                       | <i>ggtggn</i> <sub>13,17</sub> <i>tegtcc</i> (0.69, 19.12)                     |
| <i>an</i> <sub>3</sub> <i>tn</i> <sub>14,19</sub> <i>tatacta</i> (0.58, 34.36)  | <i>anantn</i> <sub>14,17</sub> <i>atacta</i> (0.58, 17.57)                     |
|                                                                                 | <i>an</i> <sub>3</sub> <i>tn</i> <sub>13,20</sub> <i>tatacta</i> (0.61, 36.86) |
| <i>tn</i> <sub>2</sub> <i>an</i> <sub>17,19</sub> <i>tatacta</i> (0.56, 22.24)  | <i>tn</i> <sub>2</sub> <i>an</i> <sub>17,19</sub> <i>tatacta</i> (0.64, 23.29) |
| <i>tn</i> <sub>15,17</sub> <i>tatacta</i> (0.62, 32.00)                         | <i>tn</i> <sub>2</sub> <i>tn</i> <sub>17,20</sub> <i>tatacta</i> (0.52, 21.38) |
| <i>tn</i> <sub>19,21</sub> <i>tatacta</i> (0.59, 22.71)                         | <i>tn</i> <sub>19,21</sub> <i>tatacta</i> (0.59, 22.71)                        |
|                                                                                 | <i>anan</i> <sub>15,18</sub> <i>tatacta</i> (0.62, 16.52)                      |
| <i>tatactan</i> <sub>16,18</sub> <i>aaa</i> (0.55, 4.79)                        |                                                                                |
|                                                                                 | <i>attn</i> <sub>16,18</sub> <i>atacta</i> (0.59, 23.16)                       |
| <i>ttn</i> <sub>11,13</sub> <i>tatacta</i> (0.54, 9.64)                         | <i>ttgn</i> <sub>19,20</sub> <i>tatacta</i> (0.88, 16.69)                      |
|                                                                                 | <i>ttgn</i> <sub>17,20</sub> <i>tatacta</i> (0.75, 19.84)                      |
|                                                                                 | <i>acttn</i> <sub>14,16</sub> <i>tataat</i> (0.68, 17.10)                      |
|                                                                                 | <i>cattn</i> <sub>14,16</sub> <i>tataat</i> (0.52, 15.79)                      |

## References

- [1] Lisser S, Margalit H: **Compilation of *E. coli* mRNA promoter sequences.** *Nucleic Acids Res* 1993, **21**(7):1507–1516.
- [2] Becker G, Hengge-Aronis R: **What makes an *Escherichia coli* promoter  $\sigma^S$  dependent? Role of the -13/-14 nucleotide promoter positions and region 2.5 of  $\sigma^S$ .** *Mol Microbiol* 2001, **39**(5):1153–1165.
- [3] Wosten M: **Eubacterial sigma-factors.** *FEMS Microbiology Reviews* 1998, **22**:127–150.
- [4] Cao M, Kobel P, Morshedi M, Wu M, Paddon C, Helmann J: **Defining the *Bacillus subtilis*  $\sigma^W$  Regulon: A Comparative Analysis of Promoter Consensus Search, Run-off Transcription/Microarray Anal-**

ysis (ROMA), and Transcriptional Profiling Approaches. *J Mol Biol*  
2002, **316**:443–457.
