# Supplementary material for: SIGffRid: A tool to search for sigma factor binding sites in bacterial genomes using comparative approach and biologically driven statistics
Source: Springer Nature journal article supplement (doi:10.1186/1471-2105-9-73), 2008-01-31
Supplement: 12859_2007_2058_MOESM6_ESM.pdf [file 12859_2007_2058_MOESM6_ESM.pdf]

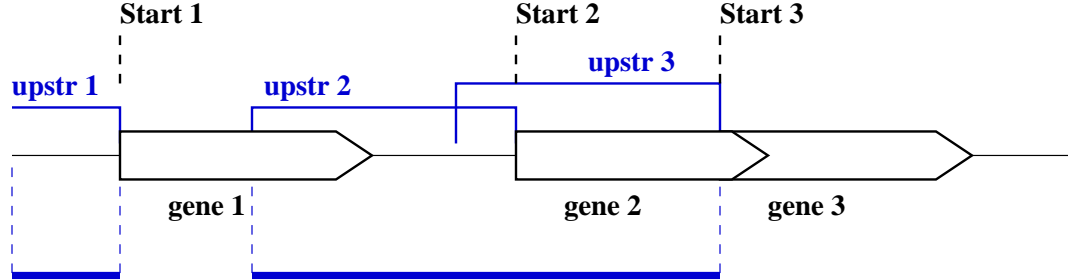

merged upstream  
sequence 1 (= upstr 1)

merged upstream sequence 2  
(merging of upstr 2 and upstr 3)
