# Supplementary material for: SIGffRid: A tool to search for sigma factor binding sites in bacterial genomes using comparative approach and biologically driven statistics
Source: Springer Nature journal article supplement (doi:10.1186/1471-2105-9-73), 2008-01-31

**bacterium 1**

**bacterium 2**

**seq. 1**

**seq. 1**

**seq. 3**

**seq. 3**

**seq. 9**

**seq. 9**

(...)

**seq. n**

**seq. n**

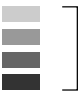

**words given by R'MES**

**SS1**

**SS2**

**hits of seeds**

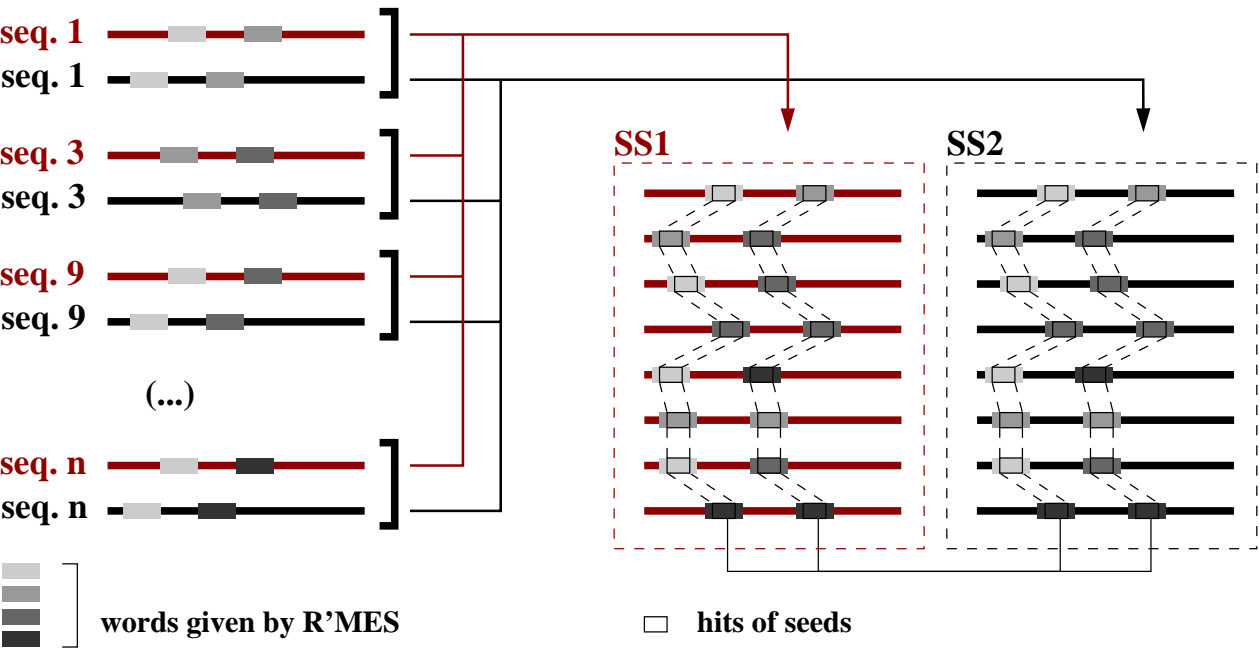

Supplement: 12859_2007_2058_MOESM8_ESM.pdf [file 12859_2007_2058_MOESM8_ESM.pdf]
