# Supplementary material for: SIGffRid: A tool to search for sigma factor binding sites in bacterial genomes using comparative approach and biologically driven statistics
Source: Springer Nature journal article supplement (doi:10.1186/1471-2105-9-73), 2008-01-31

# bacterium 1

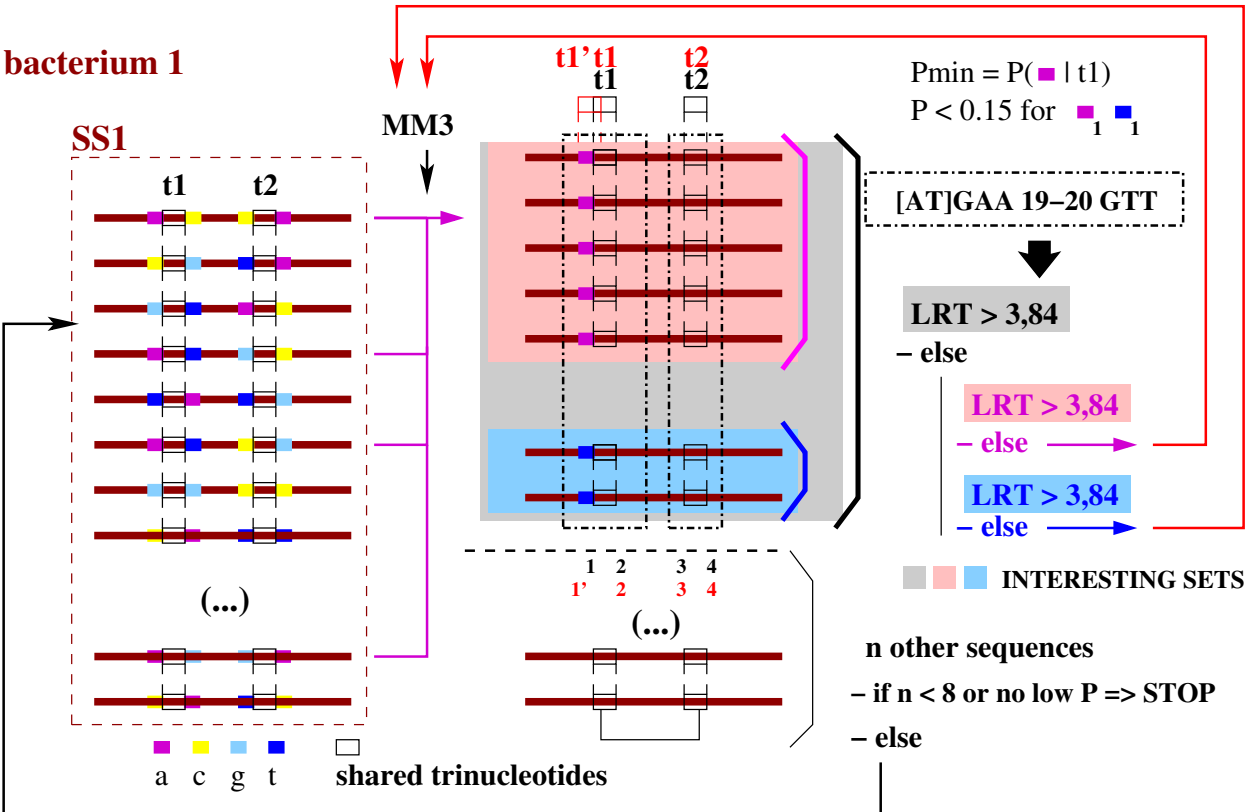

Supplement: 12859_2007_2058_MOESM9_ESM.pdf [file 12859_2007_2058_MOESM9_ESM.pdf]
